# Supplementary material for: Fluxes and sources of nutrients and trace metalsatmospheric deposition in the northwestern Mediterranean
Source: Copernicus journal article supplement (doi:10.5194/acp-2018-113), 2018-06-05
Supplement: Supplementary file 1 [file Flux_weekly_publi_SI.xlsx]

## Sheet: Atmospheric fluxes
Atmospheric fluxes (mg/m2/week)
Start sampling	End sampling	Al	Ca	S	P	N	Si	Fe	As	Cr	Cu	Mn	Ni	V	Zn	mm rain
2008-03-27 09:45:00	2008-04-03 09:25:00	0.22	1.87	1.88	0.07	NA	0.82	0.32	NA	0.000728	0.00375	NA	NA	0.00138	0.0103	1.43
2008-04-03 09:25:00	2008-04-10 14:30:00	0.35	2.19	NA	0.27	NA	1.08	0.4	NA	0.000411	0.00331	NA	NA	0.00129	0.0128	0.08
2008-04-10 14:30:00	2008-04-17 09:43:00	1.02	5.77	5.72	0.02	NA	3.63	1.21	NA	0.000977	0.00395	NA	NA	0.00483	0.0141	5.19
2008-04-17 09:43:00	2008-04-25 10:30:00	12.53	50.93	18.84	0.91	NA	36.44	11.39	NA	0.00899	0.0166	NA	NA	0.0329	0.0814	17.29
2008-04-25 10:30:00	2008-05-01 17:59:00	0.14	0.81	0.89	0.58	NA	0.44	0.16	NA	0.000365	0.00282	NA	NA	0.000719	0.0259	0
2008-05-01 17:59:00	2008-05-08 10:43:00	0.09	0.58	0.85	1.35	NA	0.27	0.11	NA	0.000297	0.00576	NA	NA	0.000259	0.0535	0
2008-05-08 10:43:00	2008-05-15 13:11:00	1.33	4.95	10.17	9.03	NA	3.75	1.14	NA	0.00141	NA	NA	NA	0.00312	0.137	3.71
2008-05-15 13:11:00	2008-05-22 19:45:00	2.6	23.11	26.19	31.82	NA	4.53	1.62	NA	0.00194	NA	NA	NA	0.0265	0.883	0
2008-05-22 19:45:00	2008-05-30 18:23:00	11.23	31.58	9.11	4.4	NA	28.02	10.36	NA	0.00481	NA	NA	NA	0.0155	0.151	12.55
2008-05-30 18:23:00	2008-06-05 09:53:00	1.42	6.22	2.07	2.14	NA	4.01	1.26	NA	0.000445	NA	NA	NA	0.00107	0.0651	0.05
2008-06-05 09:53:00	2008-06-12 09:00:00	0.93	2.88	3.24	2.7	NA	2.46	0.71	NA	0.000403	NA	NA	NA	0.000707	0.0772	0
2008-06-12 09:00:00	2008-06-19 19:00:00	1.03	4.83	4.08	3.14	NA	2.85	0.93	NA	0.00125	NA	NA	NA	0.00244	0.0844	2.43
2008-06-19 19:00:00	2008-06-28 10:00:00	0.1	0.91	1.57	2.25	NA	0.19	0.09	NA	0.000151	NA	NA	NA	0.000277	0.0511	0
2008-06-28 10:00:00	2008-07-03 10:00:00	0.08	0.74	1.73	2.34	NA	0.25	0.09	NA	0.000237	NA	NA	NA	0.000139	0.0553	0
2008-07-03 10:00:00	2008-07-10 20:00:00	0.22	1.7	1.19	1.12	NA	0.6	0.22	NA	3.97e-05	NA	NA	NA	0.000282	0.0315	0
2008-07-10 20:00:00	2008-07-24 17:00:00	1.13	3.49	4.78	3.3	NA	3.17	0.91	NA	0.00106	NA	NA	NA	0.0014	0.109	0.06
2008-07-24 17:00:00	2008-07-31 17:50:00	0.23	1.33	1.42	2.5	NA	0.52	0.19	NA	0.000536	NA	NA	NA	0.000411	0.0766	0
2008-07-31 17:50:00	2008-08-10 08:40:00	0.48	2.24	2.56	2.57	NA	1.2	0.39	NA	0.000406	NA	NA	NA	0.00056	0.0958	0
2008-08-10 08:40:00	2008-08-15 10:00:00	0.16	1.35	2.16	2.48	NA	0.33	0.14	NA	0.000278	NA	NA	NA	0.000153	0.069	0
2008-08-15 10:00:00	2008-08-21 18:00:00	0.24	1.38	1.17	0.65	NA	0.65	0.21	NA	0.000312	NA	NA	NA	0.000362	0.0268	0
2008-08-21 18:00:00	2008-08-29 18:50:00	0.28	1.36	1.75	0.92	NA	0.77	0.26	NA	0.000139	NA	NA	NA	0.000368	0.0421	0
2008-08-29 18:50:00	2008-09-04 09:20:00	0.08	0.59	0.64	0.72	NA	0.23	0.08	NA	0.000175	NA	NA	NA	NA	0.0313	0
2008-09-04 09:20:00	2008-09-16 10:00:00	5.59	21.71	19.22	3.13	NA	13.53	4.86	0.0155	0.0108	0.0186	0.133	0.00992	0.0288	0.168	17.48
2008-09-16 10:00:00	2008-09-24 10:40:00	0.55	1.66	4.59	0.51	NA	1.58	0.58	NA	0.00647	0.00762	0.0192	0.00327	0.00758	0.102	12.57
2008-09-24 10:40:00	2008-09-30 09:10:00	0.28	0.95	1.47	1.26	NA	1.06	0.3	0.00481	0.000251	0.0107	0.0156	0.00105	0.00302	0.0586	0.11
2008-09-30 09:10:00	2008-10-07 15:20:00	0.38	1.65	2.19	0.1	NA	1.3	0.37	NA	4.28e-05	0.00241	0.00649	NA	0.00554	0.00798	1.86
2008-10-07 15:20:00	2008-10-14 11:11:00	0.31	0.45	0.35	0.7	NA	0.95	0.3	0.0021	5.5e-05	0.00214	0.00918	0.000468	0.000264	0.0284	0
2008-10-14 11:11:00	2008-10-21 09:30:00	0.77	1.59	0.82	0.5	NA	2.21	0.6	0.00199	0.00267	0.0165	0.0233	0.00255	0.00516	0.0579	0
2008-10-21 09:30:00	2008-10-28 11:00:00	1.32	4.77	11.29	3.19	NA	3.17	1.29	0.0166	0.0125	0.0227	0.259	0.00483	0.031	0.17	8.04
2008-10-28 11:00:00	2008-11-04 14:40:00	8.68	34.54	27.27	0.47	NA	18.22	6.05	NA	0.00334	0.0156	0.499	0.0132	0.0137	0.0744	28.12
2008-11-04 14:40:00	2008-11-18 14:41:00	1.01	7.36	12.3	0.1	NA	1.44	0.74	NA	0.00169	0.00262	0.0445	NA	0.00555	0.0352	28.8
2008-11-18 14:41:00	2008-11-26 09:15:00	0.61	11.19	29.29	0.05	NA	1.05	0.52	0.00257	0.000949	0.0162	0.0632	0.0065	0.0123	0.0869	23.78
2008-11-26 09:15:00	2008-12-03 10:20:00	3.2	25.64	39.75	0.12	NA	5.3	1.86	NA	0.00602	0.00868	0.0846	0.00509	0.0125	0.0352	28.06
2008-12-03 10:20:00	2008-12-08 10:12:00	0.29	2.29	7.04	0	NA	0.1	0.19	NA	0.00292	0.00301	0.0104	0.0018	0.00228	0.000777	8.73
2008-12-08 10:12:00	2008-12-16 09:30:00	0.55	3.44	6.99	0.01	NA	0.55	0.34	NA	0.00194	0.00221	0.0211	0.00216	0.0058	0.0146	20.07
2008-12-16 09:30:00	2008-12-24 10:00:00	0.07	5.16	2.45	0.93	NA	0.1	0.05	0.00684	2.28e-05	0.00386	0.109	NA	0.00464	0.0968	5.43
2008-12-24 10:00:00	2009-01-06 13:50:00	0.05	1.3	4.09	0.84	NA	0.12	0.07	NA	NA	0.00388	0.0151	0.00247	0.00132	0.055	7.12
2009-01-06 13:50:00	2009-01-13 09:30:00	0.07	1.15	8.12	0.01	NA	0.26	0.04	NA	NA	NA	0.00698	NA	0.00348	NA	22.54
2009-01-13 09:30:00	2009-01-22 14:30:00	0.24	2.29	5.52	0.35	NA	0.56	0.15	0.002	0.00037	0.00372	0.00818	0.00155	0.00902	0.0152	7.02
2009-01-22 14:30:00	2009-02-03 12:00:00	0.52	8.4	23.25	0.39	NA	0.97	0.36	0.00377	0.00225	0.00339	0.017	0.00342	0.00669	0.0115	24.83
2009-02-03 12:00:00	2009-02-17 08:30:00	15.41	35.41	23.21	0.2	NA	34.03	9.32	0.0102	0.0286	0.0266	0.204	0.0318	0.0624	0.119	16.66
2009-02-17 08:30:00	2009-02-24 11:00:00	0.15	1.4	2.58	1.88	NA	0.56	0.12	NA	0.00426	0.00293	0.00583	0.000987	0.0041	0.0417	0.24
2009-02-24 11:00:00	2009-03-03 12:35:00	1.22	2.98	9.29	8.95	NA	3.2	0.8	NA	0.00121	0.00731	0.0257	0.00211	0.00403	0.123	4.86
2009-03-03 12:35:00	2009-03-11 08:30:00	5.2	18.24	21.14	14.01	NA	9.23	3.58	0.00648	0.00337	0.0224	0.144	0.00716	0.0183	0.209	16.02
2009-03-11 08:30:00	2009-03-17 08:30:00	0.22	0.76	2.01	0.43	NA	0.71	0.16	NA	0.00167	0.00349	0.00599	0.000697	0.00297	0.0162	0
2009-03-17 08:30:00	2009-03-24 07:10:00	0.21	1.08	1.25	0.88	NA	0.74	0.18	NA	0.000212	0.00456	0.00721	0.000468	NA	0.0344	0
2009-03-24 07:10:00	2009-03-31 17:50:00	7.74	17.38	9.02	0.18	NA	16.96	4.92	0.0027	0.0123	0.0167	0.124	0.011	0.032	0.0167	23.79
2009-03-31 17:50:00	2009-04-07 07:40:00	1.15	2.78	3.91	0.23	NA	2.92	0.7	NA	0.00259	0.00419	0.0189	0.00267	0.00775	0.0123	8.57
2009-04-07 07:40:00	2009-04-15 08:45:00	1.46	2.65	1.95	1.2	NA	3.77	0.84	0.0024	0.00427	0.00981	0.0287	0.00128	0.00673	0.0682	0.1
2009-04-15 08:45:00	2009-04-21 10:30:00	9.76	14.11	10.72	0.07	NA	22.61	5.81	0.00697	0.0154	NA	0.115	0.0163	0.0468	0.0596	27.67
2009-04-21 10:30:00	2009-04-29 10:20:00	57.56	88.86	45.48	6.61	NA	138.28	31.11	NA	0.0224	0.0474	0.629	0.0471	0.0435	0.079	29.04
2009-04-29 10:20:00	2009-05-12 08:50:00	3	1.79	4.31	3.47	NA	8.14	1.99	0.00239	0.00493	0.0183	0.143	0.00437	0.0141	0.139	0
2009-05-12 08:50:00	2009-05-20 09:20:00	3.77	4.9	9.94	10.49	NA	9.77	2.41	0.0036	0.00718	0.0571	0.459	0.00297	0.0126	0.332	0.11
2009-05-20 09:20:00	2009-05-26 19:00:00	1.01	1.95	3.92	4.32	NA	2.62	0.62	NA	NA	0.0188	0.0678	NA	0.0018	0.183	0
2009-05-26 19:00:00	2009-06-03 08:30:00	2.6	5.11	12.23	6.18	NA	6.31	1.72	0.00185	0.0128	0.033	0.0764	0.00183	0.0166	0.187	13.34
2009-06-03 08:30:00	2009-06-15 17:50:00	1.8	4.58	4.85	3.53	NA	4.88	1.11	0.0078	0.00825	0.0213	0.0466	0.00223	0.00887	0.13	0
2009-06-15 17:50:00	2009-06-22 10:30:00	1.84	4.87	10.48	1.34	NA	4.75	1.21	0.00348	0.000202	0.0204	0.0683	0.00466	0.00595	0.0946	5.63
2009-06-22 10:30:00	2009-06-29 11:00:00	0.16	0.51	0.54	0.61	NA	0.49	0.13	NA	0.00384	0.0113	0.00917	NA	0.00329	0.0289	0
2009-06-29 11:00:00	2009-07-07 08:30:00	0.22	0.61	0.71	0.77	NA	0.7	0.16	0.00269	0.00589	0.0134	0.0138	0.000581	0.00356	0.0436	0
2009-07-07 08:30:00	2009-07-13 11:30:00	0.33	1.29	1.99	0	NA	1.03	0.27	0.00313	0.000515	0.00459	0.00686	0.00216	0.0023	0.0083	0
2009-07-13 11:30:00	2009-07-20 09:00:00	0.77	2.26	2.32	0.56	NA	2.14	0.53	NA	0.00501	0.0172	0.0175	0.0019	0.00685	0.044	0
2009-07-20 09:00:00	2009-08-05 09:10:00	0.98	3.09	3.7	1.37	NA	2.9	0.66	0.00408	0.00711	0.0188	0.0327	0.00284	0.00829	0.0946	0
2009-08-05 09:10:00	2009-08-11 20:10:00	0.27	0.78	0.75	0.41	NA	0.78	0.19	NA	0.00343	0.00789	0.00969	0.000911	0.00582	0.0309	0
2009-08-11 20:10:00	2009-08-18 09:50:00	0.1	11.1	19.13	23.9	NA	0.23	0.1	0.00104	0.00305	0.00721	0.0174	0.000579	0.00568	2.36	0
2009-08-18 09:50:00	2009-08-24 10:50:00	0.3	1.7	2.62	2.39	NA	0.83	0.2	NA	0.000399	0.00808	0.0135	0.00323	0.00477	0.255	0
2009-08-24 10:50:00	2009-08-31 10:20:00	2.49	10.4	56.92	25.48	NA	6.31	2.08	0.00728	0.00375	0.149	0.271	0.00926	0.0187	0.741	7.3
2009-08-31 10:20:00	2009-09-07 10:20:00	0.41	1.04	2.45	0.73	NA	1.27	0.31	NA	0.00534	0.0043	0.0183	0.000458	0.00538	0.0395	0
2009-09-07 10:20:00	2009-09-14 17:00:00	0.55	1.42	0.78	0.72	NA	1.81	0.45	NA	0.00362	0.00458	0.0196	0.000844	0.000331	0.0549	0
2009-09-14 17:00:00	2009-09-28 08:50:00	1.65	6.24	9.85	4.18	NA	3.98	1.36	0.00214	0.00242	0.0322	0.06	0.00844	0.00958	0.235	20.53
2009-09-28 08:50:00	2009-10-05 13:30:00	0.22	0.65	0.85	1.16	NA	0.62	0.16	0.00524	NA	0.00584	0.0116	NA	NA	0.0518	0
2009-10-05 13:30:00	2009-10-12 09:30:00	0.83	2.48	3.14	2.24	NA	2.15	0.57	NA	0.000505	0.0109	0.0297	0.00485	0.0062	0.112	6.74
2009-10-12 09:30:00	2009-10-19 10:30:00	0.48	1.62	1.67	0.31	NA	1.36	0.37	0.00242	0.00327	0.00723	0.0159	0.000993	0.00516	0.0315	0
2009-10-19 10:30:00	2009-10-26 09:30:00	0.77	4.83	8.5	6.15	NA	1.81	0.59	0.00464	NA	0.0346	0.0487	0.00458	0.00989	0.197	10.67
2009-10-26 09:30:00	2009-11-02 10:30:00	0.07	0.31	0.66	1.2	NA	NA	0.07	0.000783	0.00293	0.0106	0.0087	0.000649	0.000707	0.0486	0
2009-11-02 10:30:00	2009-11-09 14:20:00	0.36	6.28	11.71	1.95	4.88	NA	0.35	NA	0.00297	0.00858	0.0315	NA	NA	0.0828	28.75
2009-11-09 14:20:00	2009-11-16 11:00:00	0.17	3.32	4.18	1.32	4.08	NA	0.26	NA	NA	0.0303	0.0471	0.00271	0.00272	0.0974	7.02
2009-11-16 11:00:00	2009-11-24 09:40:00	0.31	1.07	0.66	0.36	1.06	0.78	0.24	NA	0.00118	0.00382	0.0106	0.00195	0.000505	0.023	0
2009-11-24 09:40:00	2009-12-01 08:40:00	0.67	4.33	4.17	0.12	2.02	1.73	0.54	0.0023	0.00135	0.0106	0.0176	NA	0.00653	0.0194	4.08
2009-12-01 08:40:00	2009-12-07 09:10:00	0.21	2.04	4.4	0.46	1.59	NA	0.18	0.00521	0.00288	0.014	0.00656	0.00116	0.00601	0.0728	7.38
2009-12-07 09:10:00	2009-12-14 08:50:00	0.06	0.65	1.23	0.12	1.4	NA	0.07	NA	NA	0.00304	0.00547	NA	0.00113	0.0193	0.77
2009-12-14 08:50:00	2009-12-28 15:10:00	2.89	18.73	16.47	0.2	5.28	7.12	2.31	0.00327	0.00831	0.011	0.0836	0.00654	0.0227	0.0301	15.48
2009-12-28 15:10:00	2010-01-04 09:00:00	0.39	5.56	11.95	0.08	1.49	0.97	0.29	0.00406	0.000951	0.0041	0.00904	0.00203	0.00325	0.0546	5.77
2010-01-04 09:00:00	2010-01-11 09:20:00	0.72	6.22	9.05	0.05	6.84	1.33	0.46	0.00154	NA	NA	0.0206	0.00796	0.0146	0.0235	28.12
2010-01-11 09:20:00	2010-01-18 14:30:00	0.04	0.87	1.78	0.03	1.86	NA	0.06	NA	0.00425	NA	0.0026	NA	NA	0.00754	9.53
2010-01-18 14:30:00	2010-01-25 09:00:00	0.11	0.73	2.84	0.54	4.91	NA	0.18	0.00179	0.0019	NA	0.00612	0.00354	0.00579	0.108	10.35
2010-01-25 09:00:00	2010-02-01 10:30:00	0.19	2.19	4.04	0.65	2.39	NA	0.18	NA	0.00231	0.00834	0.0115	0.000355	0.00338	0.0451	7.57
2010-02-01 10:30:00	2010-02-15 10:50:00	0.2	4.82	12.96	0.94	6.95	NA	0.22	NA	NA	0.00759	0.0195	0.00276	0.00809	0.0995	5.5
2010-02-15 10:50:00	2010-02-23 16:40:00	3.87	17.84	6.62	0.19	2.34	10.18	3.28	0.0077	0.00598	0.0124	0.0918	0.00623	0.0242	0.0292	13
2010-02-23 16:40:00	2010-03-03 11:00:00	0.42	3.82	2.28	0.06	1.5	0.94	0.38	NA	0.000768	0.00309	0.0184	0.000716	0.00471	0.0086	4.87
2010-03-03 11:00:00	2010-03-08 10:30:00	17.92	172.38	8.99	1.34	3.64	32.48	9.71	NA	0.00882	0.0461	0.372	0.0344	0.0196	0.0373	17.12
2010-03-08 10:30:00	2010-03-09 16:00:00	0.17	0.39	0.79	0.04	1.26	NA	0.15	NA	0.00327	NA	0.00347	NA	0.00527	0.0062	4.93
2010-03-09 16:00:00	2010-03-15 11:00:00	0.04	2.17	11.34	0.04	5.79	NA	0.08	NA	NA	NA	0.0172	0.0048	0.00294	0.0258	27.47
2010-03-15 11:00:00	2010-03-22 10:40:00	4.83	5.68	2.46	2.02	1.74	11.63	2.83	0.0084	0.00602	0.0243	0.0833	0.00689	0.0187	0.0777	0.76
2010-03-22 10:40:00	2010-03-31 17:00:00	7.51	7.55	3	0.13	2.12	19.7	3.95	0.0032	0.0138	0.00866	0.0753	0.00672	0.0283	0.0422	0.63
2010-03-31 17:00:00	2010-04-07 10:50:00	4	10.93	9.36	1.73	5.07	10.13	2.82	0.00456	0.00895	0.0268	0.0787	0.0342	0.0273	0.17	6.2
2010-04-07 10:50:00	2010-04-13 10:00:00	3.79	5.37	2.49	0.59	3.17	10.6	2.55	NA	0.00382	0.00713	0.0776	0.00267	0.0189	0.045	1.63
2010-04-13 10:00:00	2010-04-19 17:00:00	0.17	0.41	0.37	0.39	0.89	NA	0.13	0.00278	0.00354	0.00423	0.0118	0.00159	0.00507	0.012	0
2010-04-19 17:00:00	2010-04-26 10:30:00	1.77	2.93	2.1	0.76	3.05	NA	1.11	0	0.00379	0.0125	0.0317	0.00774	0.0119	0.0523	24.63
2010-04-26 10:30:00	2010-05-03 10:30:00	2.73	5.98	4.3	0.79	2.59	6.02	1.78	0.00412	0.0065	0.00804	0.0484	0.00452	0.0186	0.0567	5
2010-05-03 10:30:00	2010-05-12 14:30:00	1.69	8.71	6.1	0.7	3.07	4.25	1.25	0.00738	0.00123	0.0107	0.0477	0.00716	0.0147	0.0936	9.72
2010-05-12 14:30:00	2010-05-16 09:00:00	1.09	2.64	4.85	0.22	2.77	NA	0.87	0.00123	NA	0.00955	0.0279	0.00243	0.00847	0.0209	7.59
2010-05-16 09:00:00	2010-05-25 16:30:00	0.87	1.71	3.26	1.87	2.77	NA	0.66	0.00448	0.000388	0.0105	0.0336	0.00172	0.00233	0.118	0.46
2010-05-25 16:30:00	2010-05-31 13:50:00	0.1	7.18	3.81	6.01	1.33	0.33	0.11	NA	0.00198	0.0528	0.0538	0.00267	0.00304	0.141	0
2010-05-31 13:50:00	2010-06-07 10:15:00	0.18	12.93	4.98	4.58	1.54	0.6	0.15	0.00517	0.000264	0.0369	0.0671	0.00185	0.000207	0.142	0
2010-06-07 10:15:00	2010-06-14 18:00:00	8.87	104.48	21.02	25.86	4.45	27.07	8.6	0.1	0.0134	0.162	0.737	0.0168	0.0344	0.553	2.65
2010-06-14 18:00:00	2010-06-25 16:40:00	14.4	27.9	16.55	2.62	6.56	47.88	10.33	0.0161	0.0233	0.0391	0.223	0.0212	0.064	0.229	20.82
2010-06-25 16:40:00	2010-07-05 08:40:00	0.13	0.53	0.73	0.91	0.99	0.46	0.11	NA	0.00455	0.0185	0.01	NA	0.000208	0.0341	0
2010-07-05 08:40:00	2010-07-12 10:00:00	0.34	0.45	0.6	0.79	1.56	1.07	0.24	NA	0.00313	0.0159	0.00822	0.000771	0.00172	0.0277	0
2010-07-12 10:00:00	2010-07-20 08:30:00	0.4	1.02	1.13	1.37	1.21	1.23	0.3	NA	0.00225	0.0128	0.0137	NA	0.000456	0.0812	0
2010-07-20 08:30:00	2010-07-26 09:50:00	0.26	4.25	12.36	16.91	5.25	0.81	0.37	0.00484	0.000821	0.0662	0.283	0.000999	0.000446	0.493	0
2010-07-26 09:50:00	2010-08-04 08:30:00	0.7	5.23	14.21	19.86	6.72	2.15	0.68	0.0114	0.00428	0.108	0.323	0.0039	0.00516	0.713	0
2010-08-04 08:30:00	2010-08-16 10:30:00	2.52	7.54	13.46	16.26	6.18	7.42	1.64	0.00968	0.0057	0.0729	0.251	0.00509	0.0118	0.487	2.7
2010-08-16 10:30:00	2010-08-23 10:20:00	0.69	1.18	1.24	1.53	2.41	2.16	0.47	NA	0.000234	0.00829	0.0274	NA	0.000305	0.0782	0
2010-08-23 10:20:00	2010-08-30 19:30:00	0.29	7.38	14.9	31.14	6.25	0.74	0.42	NA	0.00325	0.134	0.442	0.00338	0.000472	0.962	0
2010-08-30 19:30:00	2010-09-06 11:40:00	0.46	9.41	19.85	42.48	8.77	1.25	0.59	NA	0.00117	0.158	0.592	0.00062	0.000475	1.29	0
2010-09-06 11:40:00	2010-09-13 09:00:00	2.26	9.38	9.31	4.2	8.17	6.31	1.6	0.00609	0.00592	0.0113	0.0899	0.00832	0.0282	0.18	16.2
2010-09-13 09:00:00	2010-09-20 15:30:00	2.3	6.87	2.42	0.22	2.83	8.39	1.71	NA	0.00461	0.00136	0.0404	0.00255	0.0125	0.0125	1.65
2010-09-20 15:30:00	2010-10-04 08:30:00	1.01	3.57	6.56	1.94	4.95	2.78	0.83	0.00604	0.0009	0.0341	0.0333	0.00431	0.0044	0.197	5.83
2010-10-04 08:30:00	2010-10-12 10:00:00	4.38	11.91	4.85	0.38	4.19	13.21	3.03	0.00246	0.00542	NA	0.0962	0.00441	0.0233	0.0187	23.15
2010-10-12 10:00:00	2010-10-26 10:00:00	0.89	5.41	13.09	0.44	7.28	2.69	0.75	0.00196	0.00338	0.00474	0.0148	0.0095	0.0147	0.0359	28.29
2010-10-26 10:00:00	2010-11-02 09:50:00	0.81	4.68	3.2	0.5	2.31	2.18	0.6	NA	0.00283	0.0252	0.0179	0.00323	0.00476	0.02	3.5
2010-11-02 09:50:00	2010-11-15 09:30:00	0.38	5.66	8.32	4.81	2.49	1.15	0.32	NA	0.000571	0.368	0.0204	0.00265	0.00762	0.0587	7.07
2010-11-15 09:30:00	2010-11-23 10:10:00	0.29	30.39	11.36	6	17.28	0.86	0.28	NA	0.00441	0.178	0.0749	0.00695	0.00953	0.174	28.58
2010-11-23 10:10:00	2010-11-30 09:00:00	0.43	34.78	9.48	2.32	3.61	1.39	0.34	0.00626	0.00125	0.059	0.0566	0.00333	0.00893	0.09	18.23
2010-11-30 09:00:00	2010-12-06 09:30:00	0.7	21.75	6.52	2.51	4.84	2.22	0.42	NA	0.000669	0.0405	0.0579	0.00399	0.0114	0.0308	27.26
2010-12-06 09:30:00	2010-12-13 09:00:00	1.49	9.64	1.52	0.7	1.01	4.42	0.98	NA	0.00382	0.00971	0.0343	0.00116	0.0095	0.0286	0.05
2010-12-13 09:00:00	2010-12-20 09:50:00	0.57	6.1	4.28	0.94	1.48	1.48	0.37	NA	0.000778	0.0393	0.0433	0.002	0.0025	0.0407	3.44
2010-12-20 09:50:00	2011-01-03 10:20:00	0.65	10.77	12.89	2.65	4.7	1.7	0.51	0.00177	0.00309	0.08	0.0582	0.0078	0.00576	0.0513	11.3
2011-01-03 10:20:00	2011-01-10 09:40:00	0.59	2.71	1.1	0.65	1.43	1.69	0.41	NA	0.000223	0.028	0.0258	0.00127	0.00157	0.0294	0.79
2011-01-10 09:40:00	2011-01-17 09:50:00	0.41	12.81	4.71	3.81	2.73	1.15	0.32	NA	0.000853	0.0497	0.129	0.00435	0.0126	0.0434	7.26
2011-01-17 09:50:00	2011-01-28 10:00:00	0.44	9.33	1.39	1.18	2.03	0.85	0.19	NA	0.000267	0.0195	0.251	0.000981	0.00095	0.08	0.33
2011-01-28 10:00:00	2011-02-07 09:10:00	0.56	3.03	4.25	1.07	2.58	0.87	0.32	NA	0.00134	0.0352	0.031	0.00335	0.00461	0.0418	15.86
2011-02-07 09:10:00	2011-02-21 10:00:00	0.38	4.07	6.18	4.87	3.57	0.54	0.25	NA	0.000909	0.0881	0.0709	0.00471	0.0035	0.08	7.46
2011-02-21 10:00:00	2011-03-05 10:20:00	0.46	2.98	9.58	0.28	2.28	1.05	0.47	0.00437	0.00369	0.0538	0.0208	0.00435	0.01	0.0773	9.21
2011-03-05 10:20:00	2011-03-12 09:20:00	0.09	0.34	0.33	0.06	1.64	0.24	0.07	NA	0.000107	0.00519	0.00371	0.000821	0.000677	0.00368	0
2011-03-12 09:20:00	2011-03-21 09:40:00	25.74	277.66	18.22	36.52	7.36	81.19	12.85	NA	0.00846	0.194	0.595	0.0317	0.027	0.294	21.66
2011-03-21 09:40:00	2011-03-29 16:00:00	1.49	3.74	3.01	0.18	2.48	4.32	1.16	NA	0.0025	0.0145	0.0307	0.00407	0.0138	0.0217	3.4
2011-03-29 16:00:00	2011-04-04 10:00:00	0.04	0.02	0.02	0	2.31	0.06	0.02	0.00456	4.69e-05	0.000733	NA	0.0016	0.000471	0.0215	0
2011-04-04 10:00:00	2011-04-11 09:30:00	0.39	0.97	0.83	0.4	1.07	1.05	0.24	NA	0.000439	0.00435	0.00803	0.000666	0.004	0.0438	0
2011-04-11 09:30:00	2011-04-26 10:00:00	4.47	9.39	6.93	2.82	4.07	9.74	2.91	0.00762	0.011	0.0326	0.145	0.00938	0.0227	0.209	10.31
2011-04-26 10:00:00	2011-05-04 09:50:00	1.6	2.91	1.75	1.98	1.59	3.73	0.94	0.00966	0.00475	0.0135	0.0341	0.00337	0.00184	0.181	0.68
2011-05-04 09:50:00	2011-05-09 09:20:00	0.33	0.71	0.7	0.91	1.24	0.83	0.23	0.00175	0.00184	0.00588	0.0126	0.00266	0.000555	0.0988	0
2011-05-09 09:20:00	2011-05-16 09:40:00	0.62	1.68	1.41	1.58	1.88	1.63	0.44	NA	0.00241	0.0127	0.108	0.00332	0.00312	0.0778	0
2011-05-16 09:40:00	2011-05-23 09:40:00	0.25	0.71	0.69	1.25	1.28	0.64	0.2	NA	0.0034	0.00578	0.0245	0.000821	NA	0.093	0
2011-05-23 09:40:00	2011-05-30 19:00:00	0.42	1.61	1.76	2.9	1.45	1.12	0.35	NA	0.0033	0.0148	0.0943	0.00233	0.000548	0.113	0
2011-05-30 19:00:00	2011-06-06 14:20:00	9.11	18.17	13.93	3.15	7.1	20.41	5.68	0.00606	0.0185	0.0517	0.155	0.0195	0.0467	0.177	14.18
2011-06-06 14:20:00	2011-06-13 11:15:00	0.84	2.49	5.01	1.04	2.47	NA	0.57	NA	0.00462	0.0157	0.0196	0.00195	0.00824	0.111	13.67
2011-06-21 09:30:00	2011-07-04 09:45:00	0.56	2.83	3.64	5.54	2.65	1.47	0.46	0.00272	0.00618	0.0675	0.0506	0.00139	0.000946	0.16	0
2011-07-04 09:45:00	2011-07-12 11:00:00	2	4.91	3.76	2.31	3.02	4.75	1.24	NA	0.000967	0.0194	0.0746	0.00512	0.00548	0.129	1.59
2011-07-12 11:00:00	2011-07-18 09:45:00	1.99	3.48	1.95	0.75	1.42	4.94	1.23	NA	0.0025	0.0173	0.0336	0.006	0.00452	0.129	0
2011-07-18 09:45:00	2011-08-01 17:45:00	2.73	11.47	10.21	1.1	4.51	6.67	1.86	0.00209	0.00846	0.0358	0.061	0.0074	0.0164	0.102	10.28
2011-08-01 17:45:00	2011-08-08 18:05:00	0.89	1.55	0.79	0.96	1.09	2.22	0.63	0.00371	0.00884	0.0159	0.021	0.00296	0.0009	0.167	0
2011-08-08 18:05:00	2011-08-16 14:50:00	0.38	0.99	1.04	0.58	1.41	1.03	0.26	0.00244	0.00426	0.00688	0.0128	0.000851	0.00193	0.0311	0
2011-08-16 14:50:00	2011-08-24 09:30:00	0.4	0.79	0.5	0.58	1.24	1.03	0.27	0.00184	0.00487	0.00355	0.02	0.000758	0.00209	0.0877	0
2011-08-24 09:30:00	2011-08-29 10:30:00	0.57	1.58	1.32	0.68	0.91	1.46	0.39	NA	0.00032	0.00456	0.0191	0.000611	0.00114	0.0367	0
2011-08-29 10:30:00	2011-10-21 09:30:00	7.62	24.58	10.87	15.24	3.57	17.77	5.52	0.00591	0.0157	0.0678	0.265	0.015	0.0327	0.43	5.93
2011-10-21 09:30:00	2011-10-31 11:00:00	3.44	14.46	23.68	3.78	11.34	7.94	2.52	0.00606	0.0107	0.0567	0.161	0.0193	0.0382	0.409	18.2
